# Supplementary material for: Pyrido[1,2-a]quinoxalines: synthesis, crystal structure determination and pH-dependent fluorescenceElectronic supplementary information (ESI) available: NMR data of compounds 3a–k and views of the crystal structures of 3g, 3i and 3k. See http://www.rsc.org/suppdata/p2/b1/b102755g/
Source: Royal Society of Chemistry journal article supplement (doi:10.1039/b102755g), 2001-12-03
Supplement: b102755g_A.doc [file b102755g_A.doc]

**Supplementary data**

**Crystal Structure Information**

**Figure 1. A view of 3g from the crystal structure showing the anisotropic atomic displacement ellipsoids.**

**Figure 2. A view of 3i from the crystal structure showing the anisotropic atomic displacement ellipsoids.**

**Figure 3. A view of 3k from the crystal structure showing the anisotropic atomic displacement ellipsoids.**

**Figure 4. A view of 3g showing the unit cell packing.**

**Figure 5. A view of 3i showing the unit cell packing.**

**Figure 6. A view of 3k showing the unit cell packing.**


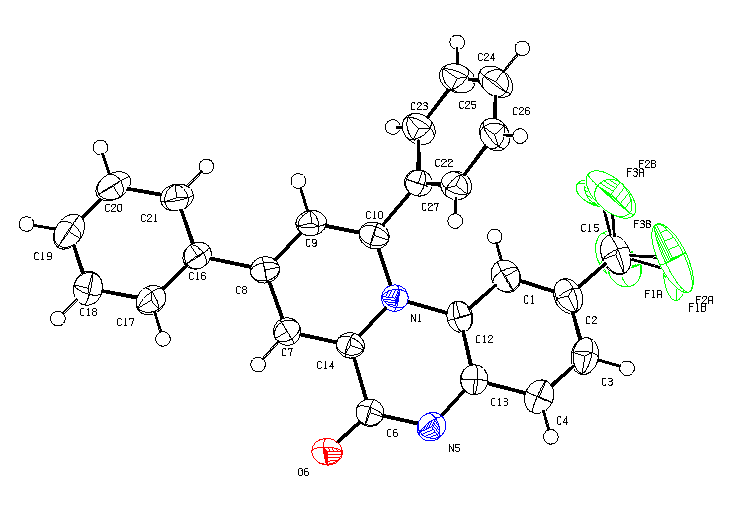


**Figure 1.** A view of **3g** from the crystal structure showing the numbering scheme employed. Anisotropic atomic displacement ellipsoids for the non-hydrogen atoms are shown at the 50% probability level. Hydrogen atoms are displayed with an arbitrarily small radius.


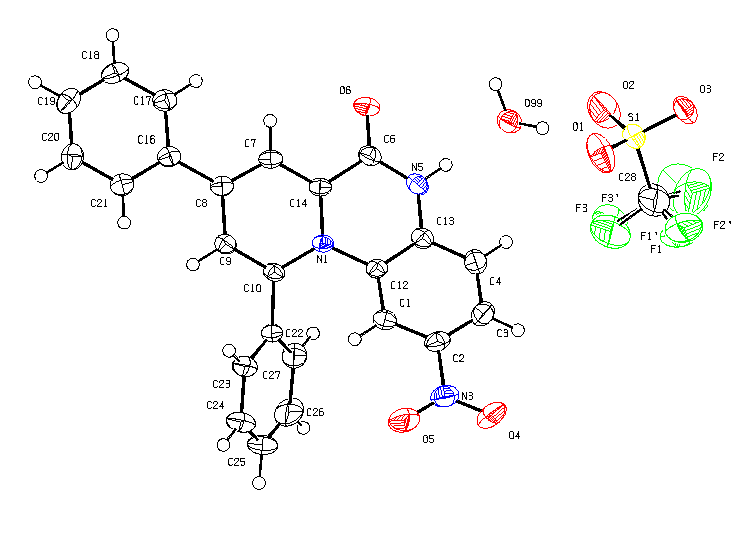


**Figure 2.** A view of **3**i from the crystal structure showing the numbering scheme employed. Anisotropic atomic displacement ellipsoids for the non-hydrogen atoms are shown at the 50% probability level. Hydrogen atoms are displayed with an arbitrarily small radius.


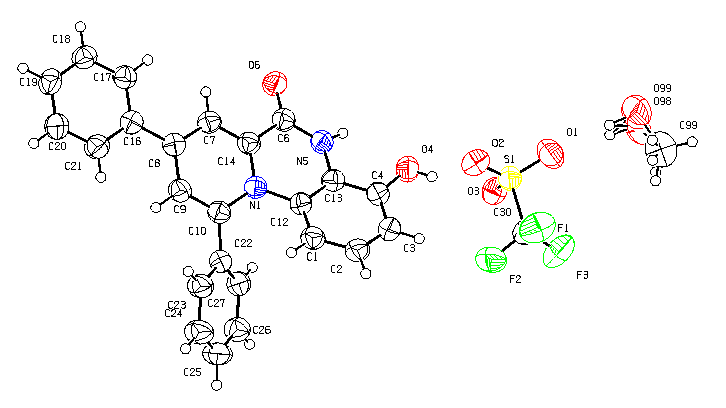


**Figure 3.** A view of the**3k** from the crystal structure showing the numbering scheme employed. Anisotropic atomic displacement ellipsoids for the non-hydrogen atoms are shown at the 50% probability level. Hydrogen atoms are displayed with an arbitrarily small radius.

**
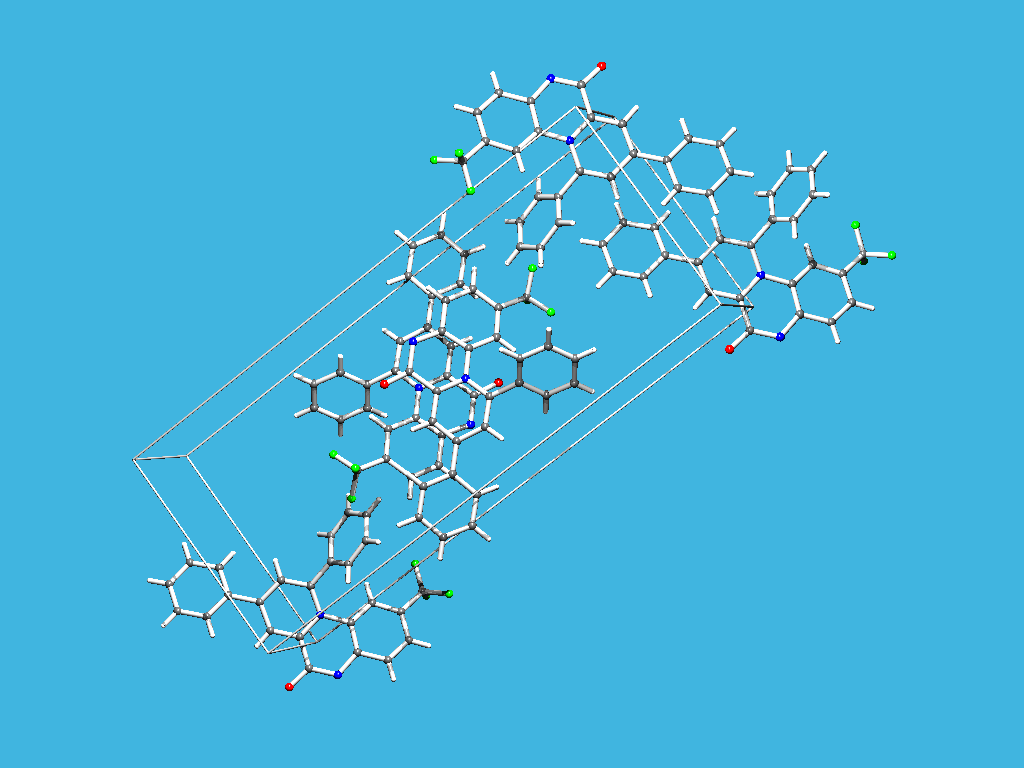
**

**Figure 4.** A view of **3g** showing the unit cell packing. The origin of the unit cell box is on the center right. The a-axis goes back into the page, the b-axis is approximately vertical and the c-axis is across the page. There are no classical hydrogen bonds for **3g.**

**
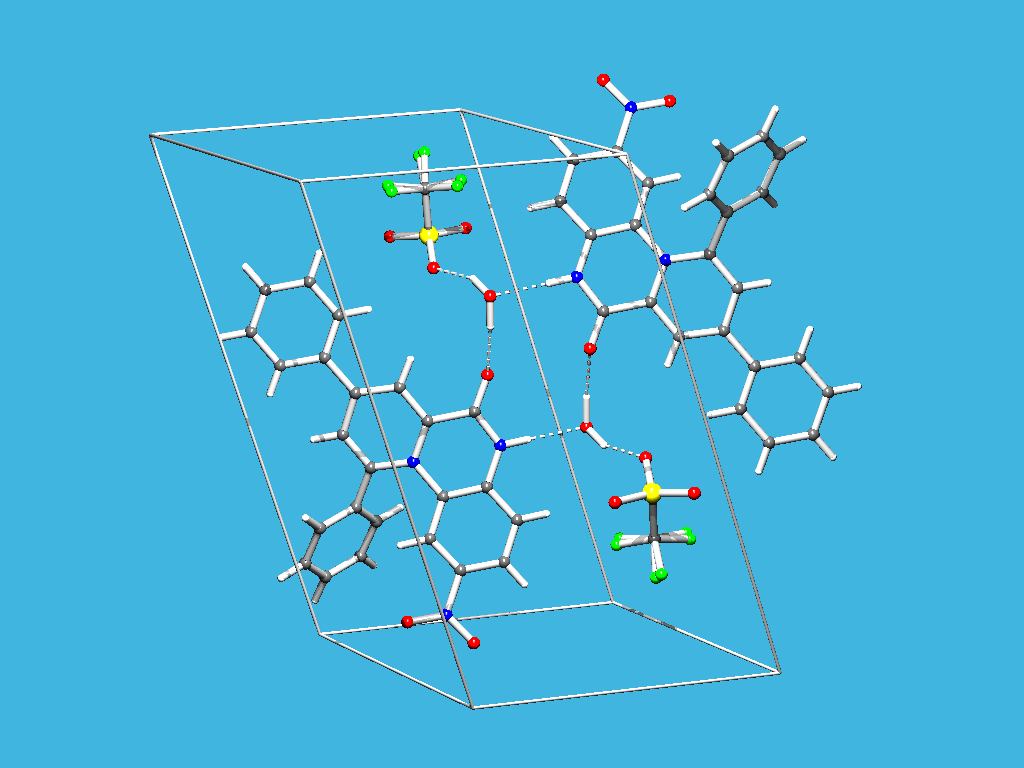
**

**Figure 5.** A view of **3i** showing the unit cell packing. The origin of the unit cell box is on the bottom right. The a-axis goes back into the page, the b-axis across the page and the c-axis is approximately vertical. Disordered atoms are omitted for clarity. Metrical details for the hydrogen bonding interaction shown in the figure are:

N5-H5A: 0.87(4), H5A….O99: 1.89(5), N5….O99: 2.755(4), N5-H5A….O99: 1171(4)

O99-H99A: 0.97(5), H99A….O2: 1.81(6), O99….O: 2.724(5), O99-H99….O: 156(5)

O99-H99B: 0.97(5), H99B….O6: 1.88(5), O99….O: 2.795(4), O99-H99….O: 158(6)

+ O6 is in symmetry position 2-x,-y,1-z

**
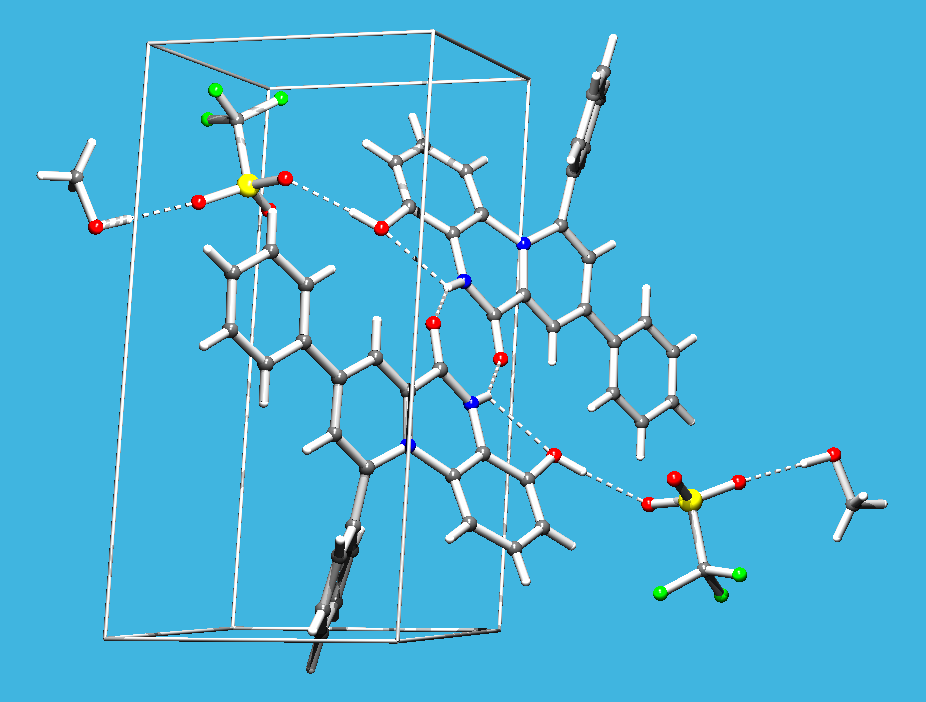
**

**Figure 6.** A view of **3k** showing the unit cell packing. The origin of the unit cell box is on the center right. The a-axis is across the page, the b-axis comes out of the page and the c-axis is approximately vertical. Disorder atoms are omitted for clarity. Metrical details for the hydrogen bonding interaction shown in the figure

are:

O4-H4O: 0.83(3), H4O….O3: 1.97(3), O4….O3: 2.794(3), O-H4O….O3: 170(4)

N5-H5N: 0.86(2), H5N….O4: 2.31(3), N5….O4: 2.693(3), N5-H5N….O4: 107(3)

N5-H5N: 0.86(2), H5N….O6+: 2.07(2), N5….O6: 2.882(3), N5-H5N….O6: 157(3)

O98-H98O: 0.88*, H98O….O1: 1.94, O98….O1: 2.827(8), O98-H98O….O1: 179

O99-H99O: 0.90*, H99O….O1: 1.97, O99….O1: 2.869(8), O99-H99O….O1: 179

* O98 is part of a disordered solvate with hydrogen atom parameters held fixed.

+ O6 is in symmetry position -x,1-y,1-z
